# Supplementary material
Source: publisher figshare collection journal article supplement (https://frontiersin.figshare.com/ndownloader/files/31181989)
Supplement: Supplementary file 1 [file 31181989]

**Table A.3. Robustness check. Multilevel logistic regression including interactions with party system polarization and disproportionality of the electoral system.**

|  | **Model 1** | **Model 2** | **Model 3** | **Model 4** |
| --- | --- | --- | --- | --- |
| Congruence | -0.01 | -0.04 | -0.01 | -0.04 |
|  | (0.04) | (0.04) | (0.04) | (0.04) |
| Change in GDP | -0.01 |  |  | **-0.05**** |
|  | (0.02) |  |  | (0.01) |
| Change in unemployment | **0.17***** |  | **0.15***** |  |
|  | (0.02) |  | (0.02) |  |
| 2 consecutive years of GDP decline |  | **0.16**** | **0.22***** |  |
|  |  | (0.05) | (0.05) |  |
| 2 consecutive years of rising unemployment |  | **0.57***** |  | **0.61***** |
|  |  | (0.05) |  | (0.05) |
| Congruence X change in GDP | 0.00 |  |  | 0.00 |
|  | (0.00) |  |  | (0.00) |
| Congruence X change in unemployment | **0.02*** |  | 0.01 |  |
|  | (0.01) |  | (0.01) |  |
| Congruence X 2 years GDP decline |  | 0.02 | 0.02 |  |
|  |  | (0.02) | (0.02) |  |
| Congruence X 2 years rise unemployment |  | **0.10***** |  | **0.11***** |
|  |  | (0.03) |  | (0.03) |
| Ideological extremism | **0.54***** | **0.54***** | **0.54***** | **0.54***** |
|  | (0.03) | (0.03) | (0.03) | (0.03) |
| Congruence X ideological extremism | **0.09***** | **0.09***** | **0.09***** | **0.09***** |
|  | (0.02) | (0.02) | (0.02) | (0.02) |
| Polarization | 0.02 | -0.00 | 0.02 | -0.02 |
|  | (0.02) | (0.02) | (0.02) | (0.02) |
| Disproportionality | 0.01 | -0.01 | -0.00 | -0.01 |
|  | (0.01) | (0.01) | (0.01) | (0.01) |
| New democracy | **0.57***** | 0.21 | **0.73***** | 0.08 |
|  | (0.16) | (0.17) | (0.17) | (0.16) |
| Congruence X Polarization | **0.04***** | **0.04***** | **0.03***** | **0.04***** |
|  | (0.01) | (0.01) | (0.01) | (0.01) |
| Congruence X Disproportionality | -0.00 | -0.00 | -0.00 | -0.00 |
|  | (0.00) | (0.00) | (0.00) | (0.00) |
| Age | **0.03***** | **0.03***** | **0.03***** | **0.03***** |
|  | (0.00) | (0.00) | (0.00) | (0.00) |
| Gender (male) | **0.04*** | **0.05*** | **0.04*** | **0.05*** |
|  | (0.02) | (0.02) | (0.02) | (0.02) |
| Education | **0.21***** | **0.21***** | **0.21***** | **0.21***** |
|  | (0.01) | (0.01) | (0.01) | (0.01) |
| (Intercept) | -0.53 | -0.29 | **-0.61*** | -0.21 |
|  | (0.28) | (0.28) | (0.28) | (0.28) |
| AIC | 74538.20 | 74461.34 | 74521.47 | 74459.08 |
| BIC | 74711.16 | 74634.30 | 74694.43 | 74632.04 |
| Log Likelihood | -37251.1 | -37212.67 | -37242.73 | -37211.54 |
| Num. obs. | 110100 | 110100 | 110100 | 110100 |
| Num. groups: country_nam | 33 | 33 | 33 | 33 |
| Num. groups: year | 21 | 21 | 21 | 21 |
| Var: country_nam (Intercept) | 1.24 | 1.22 | 1.30 | 1.15 |
| Var: year (Intercept) | 0.43 | 0.41 | 0.39 | 0.46 |
| ***p < 0.001; **p < 0.01; *p < 0.05 | | | | |
